# Supplementary material for: Transformation of the coordination nanostructures of 4,4′,4′′-(1,3,5-triazine-2,4,6-triyl) tribenzoic acid molecules on HOPG triggered by the change in the concentration of metal ions
Source: Royal Society of Chemistry journal article supplement (doi:10.1039/d1ra09073a), 2022-01-01
Supplement: d1ra09073a1.pdf [file d1ra09073a1.pdf]

# Supplementary Information

## **Transformation of the coordination nanostructures of 4,4',4''-(1,3,5-Triazine-2,4,6-triyl) tribenzoic acid molecule on HOPG triggered by the change in the concentration of metal ions**

Sihao Li,<sup>a</sup> Caimei Gong,<sup>a</sup> Yuyang Zhang,<sup>a</sup> Shizhang Fu,<sup>a</sup> Zhongping Wang,<sup>a</sup> Yan Lu,<sup>a</sup> Siyi Gu,<sup>a</sup>

Xiaoqing Liu\*<sup>a</sup>, and Li Wang\*<sup>a</sup>

<sup>a</sup>Department of Physics, Nanchang University, Nanchang 330031, China.

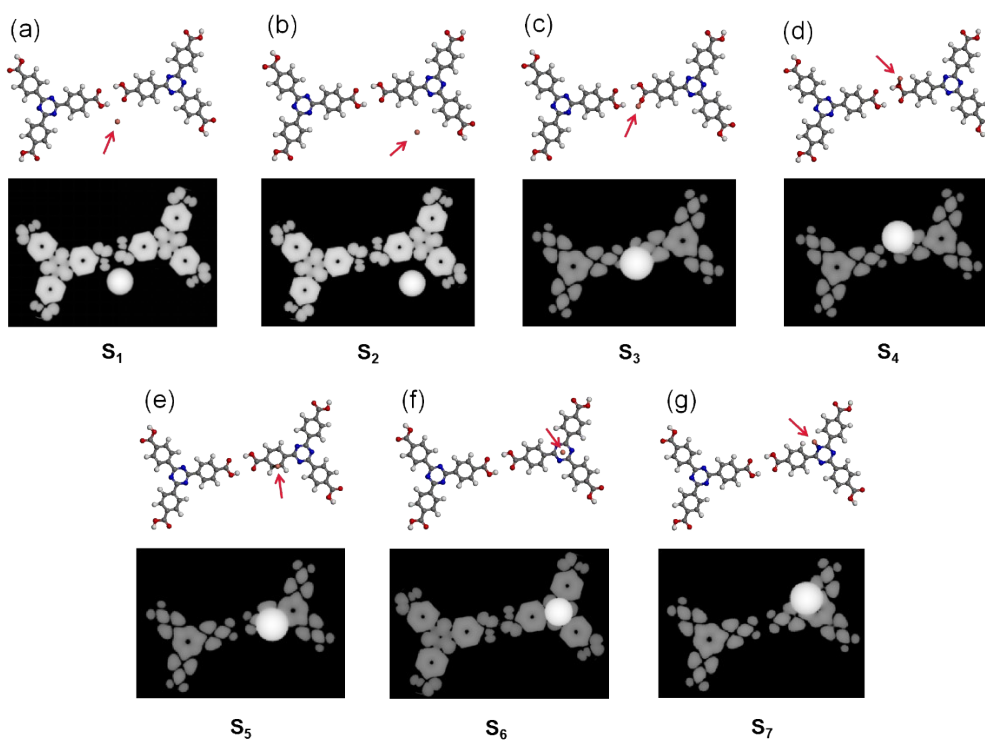

**Supplementary Figure 1.** (a)-(g) The optimized structure models and STM simulation images of  $\text{Cu}^{2+}$  adsorbed on seven potential sites ( $\text{S}_1$ - $\text{S}_7$ ) of TATB dimer, respectively. The red arrow in the figure indicates the position of  $\text{Cu}^{2+}$ .

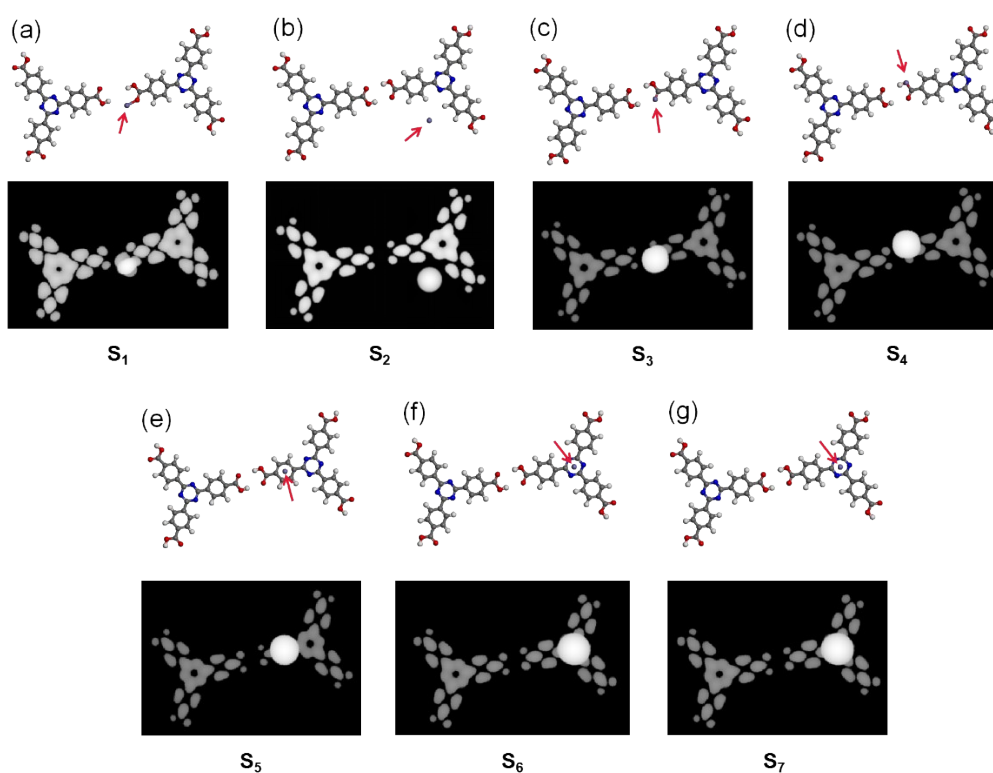

**Supplementary Figure 2.** (a)-(g) The optimized structure models and STM simulation images of  $\text{Fe}^{3+}$  adsorbed on seven potential sites ( $\text{S}_1$ - $\text{S}_7$ ) of TATB dimer, respectively. The red arrow in the figure indicates the position of  $\text{Fe}^{3+}$ .

DFT calculations were performed on the structural models of the seven adsorption sites of  $\text{Cu}^{2+}/\text{Fe}^{3+}$  on the TATB dimer, respectively. The optimized structure models and STM simulation images as shown in supplementary Figure 1 and 2. For the proposed structural model,  $\text{Cu}^{2+}/\text{Fe}^{3+}$  is at the same height as the TATB molecular plane at the  $\text{S}_1$  and  $\text{S}_2$  sites, and is about 2.8 Å higher than the TATB molecular plane at the  $\text{S}_3$ - $\text{S}_7$  sites. As shown in supplementary Figure 2f and 2g, it is identical with the optimized adsorption site and the STM simulation image of  $\text{Fe}^{3+}$  adsorbed on TATB dimer at  $\text{S}_6$  or  $\text{S}_7$  site.
